# Supplementary material for: On the crystal structure thermal evolution of formamidinium lead tribromide, CH(NH2)2PbBr3
Source: Royal Society of Chemistry journal article supplement (doi:10.1039/d1tc04642j), 2021-01-01
Supplement: d1tc04642j1.pdf [file d1tc04642j1.pdf]

### Supplementary Information

## On the crystal structure thermal evolution of formamidinium lead tribromide, $\text{CH}(\text{NH}_2)_2\text{PbBr}_3$

*Carmen Abia<sup>a,b\*</sup>, Carlos Alberto López<sup>a,c\*</sup>, María Consuelo Álvarez-Galván<sup>d</sup>, Laura Canadillas<sup>b</sup>, María Teresa Fernández-Díaz<sup>b</sup> and José Antonio Alonso<sup>a,\*</sup>*

*<sup>a</sup> Instituto de Ciencia de Materiales de Madrid, CSIC, Cantoblanco 28049 Madrid, Spain.*

*<sup>b</sup> Institut Laue Langevin. 38042 Grenoble Cedex, France.*

*<sup>c</sup> INTEQUI (UNSL-CONICET) and Facultad de Química, Bioquímica y Farmacia, UNSL, Almirante Brown 1455, 5700, San Luis, Argentina.*

*<sup>d</sup> Instituto de Catálisis y Petroleoquímica, CSIC, Cantoblanco 28049 Madrid, Spain.*

*[\\*ja.alonso@icmm.csic.es](mailto:ja.alonso@icmm.csic.es), [calopez@unsl.edu.ar](mailto:calopez@unsl.edu.ar), [abia-sanzc@ill.fr](mailto:abia-sanzc@ill.fr)*

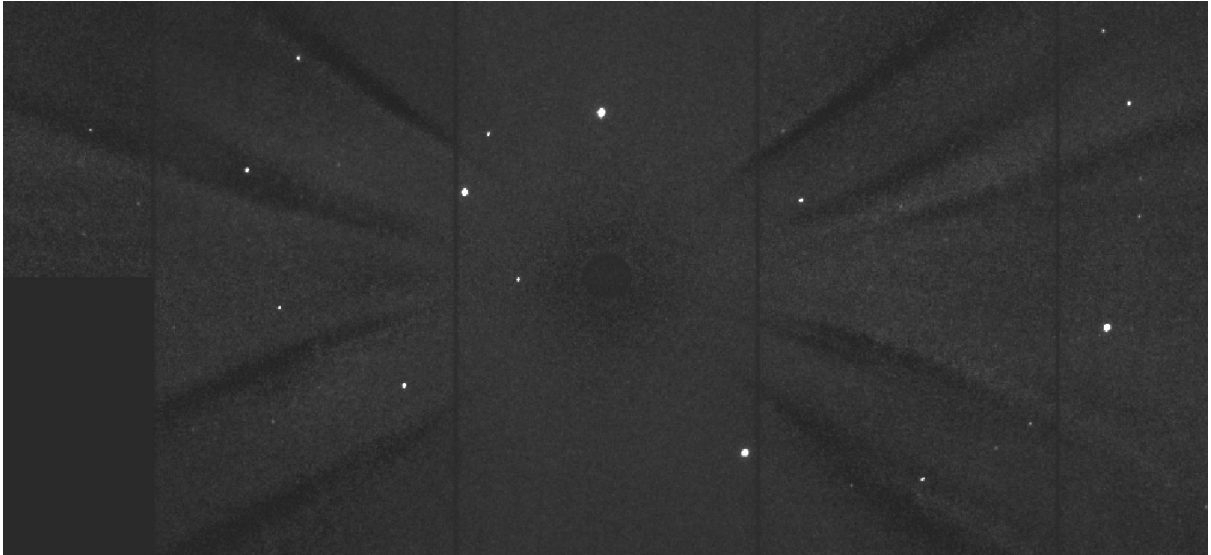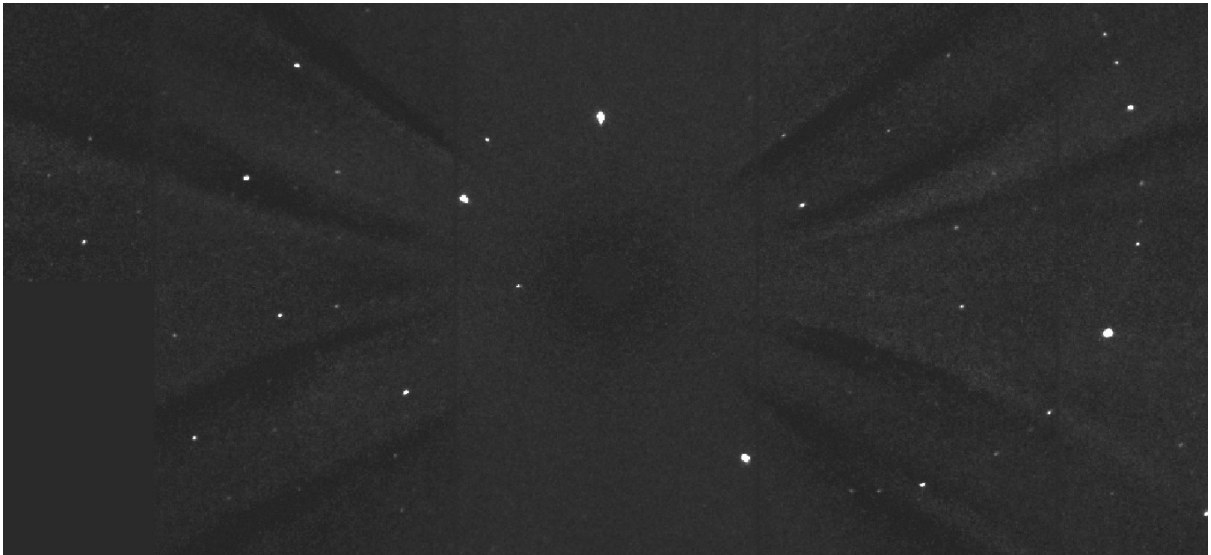

**Figure S1:** Comparative Laue diffraction pattern at 300 K (top) and 90K (bottom) where the differences in the number of reflections reveals the crystal has gone through a phase transition; data collected in the single crystal Laue diffractometer CYCLOPS, ILL.

**Table S1:** Crystallographic data for FAPbBr<sub>3</sub> from the SXRD data at room temperature.

System: Cubic, Space group:  $Pm\bar{3}m$ ,  $Z = 1$ . Unit-cell parameters:  
 $a = 5.99248(3) \text{ \AA}$ , and  $V = 215.19(1) \text{ \AA}^3$ .

| Atom                                                                                     |       | x         | Y         | z         | $U_{\text{iso}}^*/U_{\text{eq}}$ | Occ      |
|------------------------------------------------------------------------------------------|-------|-----------|-----------|-----------|----------------------------------|----------|
| Pb                                                                                       | $1a$  | 0         | 0         | 0         | 0.0356(4)                        | 1        |
| Br                                                                                       | $3d$  | 0.5       | 0         | 0         | 0.080(1)                         | 1        |
| C                                                                                        | $6f$  | 0.5       | 0.580(2)  | 0.5       | 0.02(2)*                         | 0.166    |
| N                                                                                        | $24l$ | 0.69662   | 0.490(2)  | 0.5       | 0.021(6)*                        | 0.083    |
| Anisotropic displacement parameters ( $\text{\AA}^2$ )                                   |       |           |           |           |                                  |          |
|                                                                                          |       | $U^{11}$  | $U^{22}$  | $U^{33}$  | $U^{12}$                         | $U^{23}$ |
| Pb                                                                                       |       | 0.0356(4) | 0.0356(4) | 0.0356(4) | 0                                | 0        |
| C/N                                                                                      |       | 0.024(2)  | 0.107(1)  | 0.107(1)  | 0                                | 0        |
| $R_p$ : 8.37%; $R_{wp}$ : 11.80%; $R_{exp}$ : 4.57%; $\chi^2$ : 6.6; $R_{Bragg}$ : 4.06% |       |           |           |           |                                  |          |

**Table S2:** Crystallographic data for FAPbBr<sub>3</sub> from NPD data at room temperature.

System: Cubic, Space group:  $Pm\bar{3}m$ ,  $Z = 1$ . Unit-cell parameters:  
 $a = 5.9987(4) \text{ \AA}$ , and  $V = 215.86(3) \text{ \AA}^3$ .

| Atom                                                                                     |       | x        | y        | z        | $U_{\text{iso}}^*/U_{\text{eq}}$ | Occ      |
|------------------------------------------------------------------------------------------|-------|----------|----------|----------|----------------------------------|----------|
| Pb                                                                                       | $1a$  | 0        | 0        | 0        | 0.037(2)                         | 1        |
| Br                                                                                       | $3d$  | 0.5      | 0        | 0        | 0.099(5)                         | 1        |
| C                                                                                        | $6f$  | 0.5      | 0.567(2) | 0.5      | 0.137(4)*                        | 0.166    |
| N                                                                                        | $24l$ | 0.69041  | 0.467(2) | 0.5      | 0.137(4)*                        | 0.083    |
| H1                                                                                       | $6f$  | 0.5      | 0.748(2) | 0.5      | 0.137(4)*                        | 0.166    |
| H2                                                                                       | $24l$ | 0.83073  | 0.557(2) | 0.5      | 0.137(4)*                        | 0.083    |
| H3                                                                                       | $24l$ | 0.70060  | 0.300(2) | 0.5      | 0.137(4)*                        | 0.083    |
| Anisotropic displacement parameters ( $\text{\AA}^2$ )                                   |       |          |          |          |                                  |          |
|                                                                                          |       | $U^{11}$ | $U^{22}$ | $U^{33}$ | $U^{12}$                         | $U^{23}$ |
| Pb                                                                                       |       | 0.037(2) | 0.037(2) | 0.037(2) | 0                                | 0        |
| Br                                                                                       |       | 0.037(5) | 0.130(5) | 0.130(5) | 0                                | 0        |
| $R_p$ : 1.46%; $R_{wp}$ : 1.88%; $R_{exp}$ : 1.67%; $\chi^2$ : 1.27; $R_{Bragg}$ : 11.4% |       |          |          |          |                                  |          |

**Table S3:** Position of FA and reliability factors using rigid body formalism for single crystal ND data at RT.

|                                  |                                | FA fixed along [100] direction | FA free  |
|----------------------------------|--------------------------------|--------------------------------|----------|
| Position of FA                   |                                |                                |          |
|                                  | x                              | 0.240(1)                       | 0.279(4) |
| H location*                      | y                              | 0.5                            | 0.473(4) |
|                                  | z                              | 0.5                            | 0.603(6) |
| H→CN <sub>2</sub> H <sub>4</sub> | Θ                              | 0°                             | 24.4(3)  |
| Direction**                      | Φ                              | 0°                             | 35.0(5)  |
|                                  | X                              | 0°                             | -14.3(7) |
| Reliability factors              |                                |                                |          |
|                                  | RF <sup>2</sup> =              | 21.2                           | 20.6     |
|                                  | RF <sub>w</sub> <sup>2</sup> = | 25.5                           | 25.3     |
|                                  | RF =                           | 19.7                           | 21.8     |
|                                  | χ <sup>2</sup> =               | 20.1                           | 20.2     |

\* H bonded to C

\*\* In respect to [100] direction in Euler angles

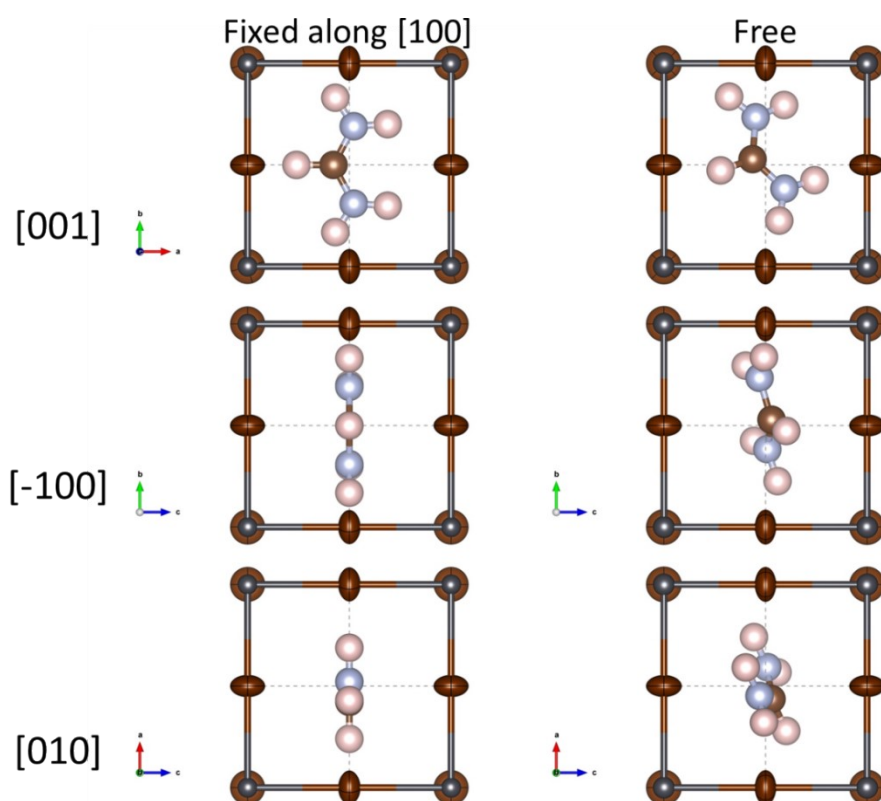

**Figure S2:** Different views of the refined crystallographic models of FAPbBr<sub>3</sub> at room temperature from SCND data. The first model was obtained by fixing the organic molecule FA along the [100] direction, while in the second one the FA unit remains free.

**Table S4:** Crystallographic results obtained from single crystal ND measurements at room temperature, including a full anisotropic refinement for all atoms.

System: Cubic, Space group:  $Pm\bar{3}m$ ,  $Z = 1$ . Unit-cell parameters:  
 $a = 6.05033 \text{ \AA}$ , and  $V = 221.48 \text{ \AA}^3$ .

| Atom                                                   |       | x          | Y          | z        | $U_{eq}$  | Occ      |          |
|--------------------------------------------------------|-------|------------|------------|----------|-----------|----------|----------|
| Pb                                                     | $1a$  | 0          | 0          | 0        | 0.045(1)  | 1        |          |
| Br                                                     | $3d$  | 0.5        | 0          | 0        | 0.091(2)  | 1        |          |
| C                                                      | $6f$  | 0.5        | 0.56267(2) | 0.5      | 0.078(2)  | 0.166    |          |
| N                                                      | $24l$ | 0.69038(3) | 0.46312(2) | 0.5      | 0.116(5)  | 0.083    |          |
| H1                                                     | $6f$  | 0.5        | 0.74448(2) | 0.5      | 0.0777(2) | 0.166    |          |
| H2                                                     | $24l$ | 0.83069(4) | 0.55355(2) | 0.5      | 0.28(1)   | 0.083    |          |
| H3                                                     | $24l$ | 0.7004(6)  | 0.29650(2) | 0.5      | 0.19(1)   | 0.083    |          |
| Anisotropic displacement parameters ( $\text{\AA}^2$ ) |       |            |            |          |           |          |          |
|                                                        |       | $U^{11}$   | $U^{22}$   | $U^{33}$ | $U^{12}$  | $U^{13}$ | $U^{23}$ |
| Pb                                                     |       | 0.045(1)   | 0.045(1)   | 0.045(1) | 0         | 0        | 0        |
| Br                                                     |       | 0.044(2)   | 0.115(2)   | 0.115(2) | 0         | 0        | 0        |
| C                                                      |       | 0.089(1)   | 0.054(2)   | 0.089(1) | 0         | 0        | 0        |
| N                                                      |       | 0.129(3)   | 0.109(6)   | 0.109(4) | 0.083(5)  | 0        | 0        |
| H1                                                     |       | 0.089(1)   | 0.054(2)   | 0.089(1) | 0         | 0        | 0        |
| H2                                                     |       | 0.116(6)   | 0.069(6)   | 0.64(2)  | 0.061(5)  | 0        | 0        |
| H3                                                     |       | 0.19(2)    | 0.12(1)    | 0.25(1)  | 0.128(8)  | 0        | 0        |
| $RF^2 = 11.1\%$ ; $RF^2_w = 13.3\%$ ; $\chi^2 = 5.92$  |       |            |            |          |           |          |          |

**Table S5:** Crystallographic results obtained from synchrotron XRD at 220 K.

System: Tetragonal, Space group:  $P4/m\bar{b}m$ ,  $Z = 2$ . Unit-cell parameters:  $a = 8.43785(5) \text{ \AA}$ ,  $c = 5.96330(4) \text{ \AA}$  and  $V = 424.57(1) \text{ \AA}^3$ .

| Atom                                                                                        |      | x         | y         | y        | $U_{iso}^*/U_{eq}$ | Occ      |          |
|---------------------------------------------------------------------------------------------|------|-----------|-----------|----------|--------------------|----------|----------|
| Pb                                                                                          | $2a$ | 0         | 0         | 0        | 0.030(2)           | 1        |          |
| Br1                                                                                         | $2b$ | 0         | 0         | 0.5      | 0.069(7)           | 1        |          |
| Br2                                                                                         | $4g$ | 0.2677(4) | 0.7677(4) | 0        | 0.065(5)           | 1        |          |
| C                                                                                           | $4f$ | 0.5       | 0         | 0.58(1)  | 0.01(2)*           | 0.5      |          |
| N                                                                                           | $8k$ | 0.40126   | 0.09874   | 0.49(1)  | 0.04(1)*           | 0.5      |          |
| Anisotropic displacement parameters ( $\text{\AA}^2$ )                                      |      |           |           |          |                    |          |          |
|                                                                                             |      | $U^{11}$  | $U^{22}$  | $U^{33}$ | $U^{12}$           | $U^{13}$ | $U^{23}$ |
| Pb                                                                                          |      | 0.010(1)  | 0.010(1)  | 0.071(3) | 0                  | 0        | 0        |
| Br1                                                                                         |      | 0.080(6)  | 0.080(6)  | 0.049(9) | 0                  |          |          |
| Br2                                                                                         |      | 0.045(4)  | 0.045(4)  | 0.105(9) | 0.039(4)           | 0        | 0        |
| $R_p: 7.30\%$ ; $R_{wp}: 10.5\%$ ; $R_{exp}: 4.58\%$ ; $\chi^2: 5.25$ ; $R_{bragg}: 3.92\%$ |      |           |           |          |                    |          |          |

**Table S6:** Crystallographic results obtained from synchrotron XRD at 170 K.System: Orthorhombic, Space group: *Pnma*,  $Z = 4$ . Unit-cell parameters:  $a = 8.40844(6)$  Å,  $b = 11.89642(4)$  Å,  $c = 8.41693(6)$  Å and  $V = 841.95(1)$  Å<sup>3</sup>.

| Atom                                                                                     |            | x         | y         | y         | $U_{iso}^*/U_{eq}$ | Occ       |           |
|------------------------------------------------------------------------------------------|------------|-----------|-----------|-----------|--------------------|-----------|-----------|
| Pb                                                                                       | 4 <i>b</i> | 0         | 0         | 0.5       | 0.0201(3)*         | 1         |           |
| Br1                                                                                      | 4 <i>c</i> | -0.012(1) | 0.25      | 0.502(3)  | 0.07(1)            | 1         |           |
| Br2                                                                                      | 8 <i>d</i> | 0.7704(9) | 0.0030(1) | 0.2257(7) | 0.054(6)           | 1         |           |
| C                                                                                        | 8 <i>d</i> | 0.5       | 0.290(1)  | 0.5       | 0.019*             | 0.5       |           |
| N                                                                                        | 8 <i>d</i> | 0.600(1)  | 0.240(3)  | 0.401(1)  | 0.025*             | 0.5       |           |
| N                                                                                        | 8 <i>d</i> | 0.401(1)  | 0.240(3)  | 0.600(1)  | 0.025*             | 0.5       |           |
| Anisotropic displacement parameters (Å <sup>2</sup> )                                    |            |           |           |           |                    |           |           |
|                                                                                          |            | $U^{11}$  | $U^{22}$  | $U^{33}$  | $U^{12}$           | $U^{13}$  | $U^{23}$  |
| Br1                                                                                      |            | 0.11(2)   | 0.003(9)  | 0.09(1)   | 0                  | -0.04(1)  | 0         |
| Br2                                                                                      |            | 0.053(6)  | 0.071(8)  | 0.038(5)  | -0.002(8)          | -0.029(3) | -0.019(6) |
| $R_p$ : 8.16%; $R_{wp}$ : 11.0%; $R_{exp}$ : 4.60%; $\chi^2$ : 5.73; $R_{bragg}$ : 4.61% |            |           |           |           |                    |           |           |

**Table S7:** Crystallographic results obtained from synchrotron XRD at 155 K.System: Orthorhombic, Space group: *Pnma*,  $Z = 4$ . Unit-cell parameters:  $a = 8.40287(5)$  Å,  $b = 11.88992(4)$  Å,  $c = 8.41310(6)$  Å and  $V = 840.55(1)$  Å<sup>3</sup>.

| Atom                                                                                     |            | x         | y        | y         | $U_{iso}^*/U_{eq}$ | Occ       |           |
|------------------------------------------------------------------------------------------|------------|-----------|----------|-----------|--------------------|-----------|-----------|
| Pb                                                                                       | 4 <i>b</i> | 0         | 0        | 0.5       | 0.0183(3)*         | 1         |           |
| Br1                                                                                      | 4 <i>c</i> | -0.013(1) | 0.25     | 0.501(3)  | 0.068(9)           | 1         |           |
| Br2                                                                                      | 8 <i>d</i> | 0.7746(7) | 0.002(1) | 0.2303(8) | 0.052(6)           | 1         |           |
| C                                                                                        | 8 <i>d</i> | 0.5       | 0.288(1) | 0.5       | 0.019*             | 0.5       |           |
| N                                                                                        | 8 <i>d</i> | 0.599(1)  | 0.238(2) | 0.401(1)  | 0.025*             | 0.5       |           |
| N                                                                                        | 8 <i>d</i> | 0.401(1)  | 0.238(2) | 0.599(1)  | 0.025*             | 0.5       |           |
| Anisotropic displacement parameters (Å <sup>2</sup> )                                    |            |           |          |           |                    |           |           |
|                                                                                          |            | $U^{11}$  | $U^{22}$ | $U^{33}$  | $U^{12}$           | $U^{13}$  | $U^{23}$  |
| Br1                                                                                      |            | 0.10(1)   | 0.003(9) | 0.097(1)  | 0                  | 0.03(1)   | 0         |
| Br2                                                                                      |            | 0.04(4)   | 0.075(8) | 0.040(5)  | -0.007(7)          | -0.028(3) | -0.022(6) |
| $R_p$ : 7.88%; $R_{wp}$ : 10.7%; $R_{exp}$ : 4.59%; $\chi^2$ : 5.43; $R_{Bragg}$ : 4.34% |            |           |          |           |                    |           |           |

**Table S8:** Crystallographic results obtained from synchrotron XRD at 120 K.System: Orthorhombic, Space group:  $Pnma$ ,  $Z = 4$ . Unit-cell parameters:  $a = 8.38791(4)$  Å,  $b = 11.87367(3)$  Å,  $c = 8.38035(4)$  Å and  $V = 834.64(1)$  Å<sup>3</sup>.

| Atom                                                                                                                   |          | x          | y         | y         | $U_{iso}^*/U_{eq}$ | Occ       |
|------------------------------------------------------------------------------------------------------------------------|----------|------------|-----------|-----------|--------------------|-----------|
| Pb                                                                                                                     | 4b       | 0          | 0         | 0.5       | 0.0131(3)*         | 1         |
| Br1                                                                                                                    | 4c       | -0.0163(9) | 0.25      | 0.501(3)  | 0.064(8)           | 1         |
| Br2                                                                                                                    | 8d       | 0.7770(5)  | 0.0029(8) | 0.241(1)  | 0.062(4)           | 1         |
| C                                                                                                                      | 8d       | 0.5        | 0.292(1)  | 0.5       | 0.019*             | 0.5       |
| N                                                                                                                      | 8d       | 0.599(1)   | 0.240(3)  | 0.401(1)  | 0.025*             | 0.5       |
| N                                                                                                                      | 8d       | 0.401(1)   | 0.240(3)  | 0.599(1)  | 0.025*             | 0.5       |
| Anisotropic displacement parameters (Å <sup>2</sup> )                                                                  |          |            |           |           |                    |           |
|                                                                                                                        | $U^{11}$ | $U^{22}$   | $U^{33}$  | $U^{12}$  | $U^{13}$           | $U^{23}$  |
| Br1                                                                                                                    | 0.06(1)  | 0.003(9)   | 0.13(1)   | 0         | 0.024(8)           | 0         |
| Br2                                                                                                                    | 0.016(3) | 0.122(5)   | 0.049(5)  | -0.019(5) | -0.031(4)          | -0.015(6) |
| R <sub>p</sub> : 8.02%; R <sub>wp</sub> : 11.0%; R <sub>exp</sub> : 4.61%; $\chi^2$ : 5.72; R <sub>bragg</sub> : 4.54% |          |            |           |           |                    |           |

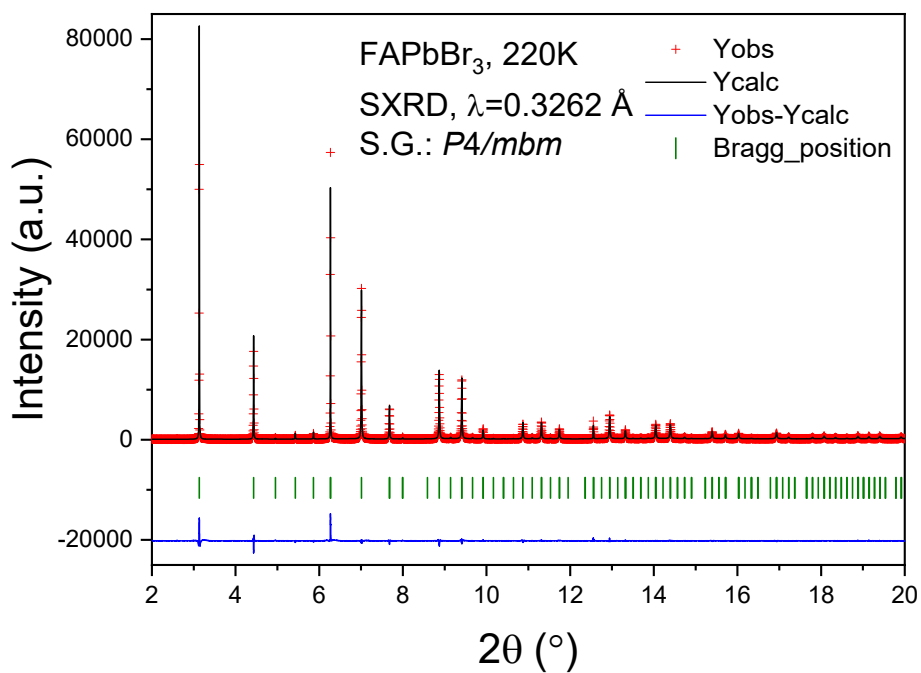

**Figure S3.** Observed (red crosses) calculated (black line) and difference (blue line) synchrotron X-ray diffraction profile after the Rietveld refinement at 220K.

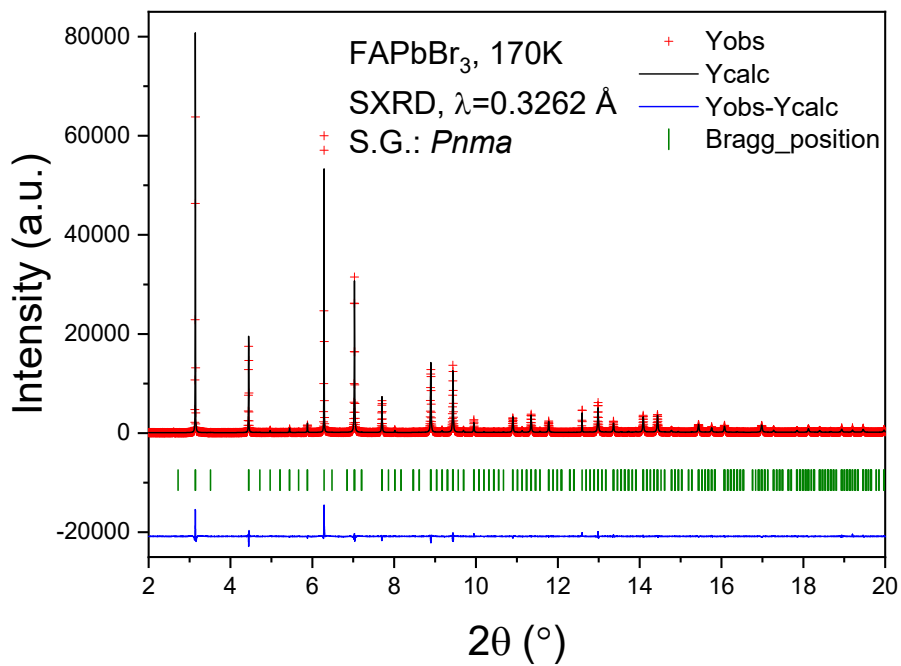

**Figure S4.** Observed (red crosses) calculated (black line) and difference (blue line) synchrotron X-ray diffraction profile after the Rietveld refinement at 170K.



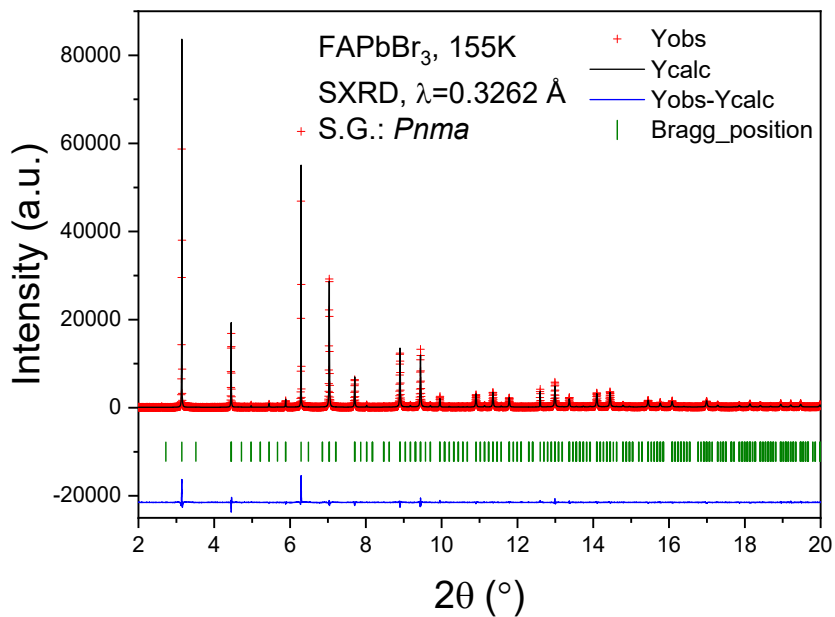

**Figure S5.** Observed (red crosses) calculated (black line) and difference (blue line) synchrotron X-ray diffraction profile after the Rietveld refinement at 155 K.

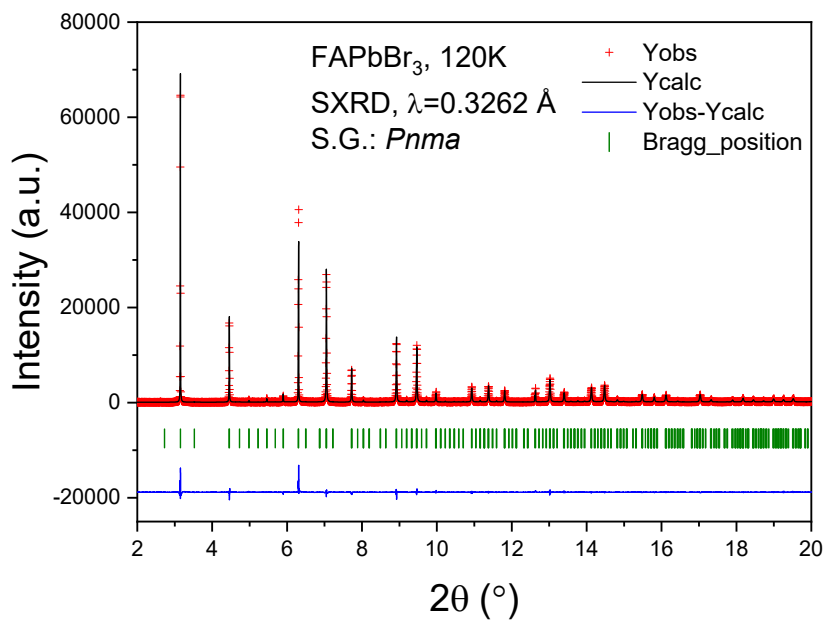

**Figure S6.** Observed (red crosses) calculated (black line) and difference (blue line) synchrotron X-ray diffraction profile after the Rietveld refinement at 120K.

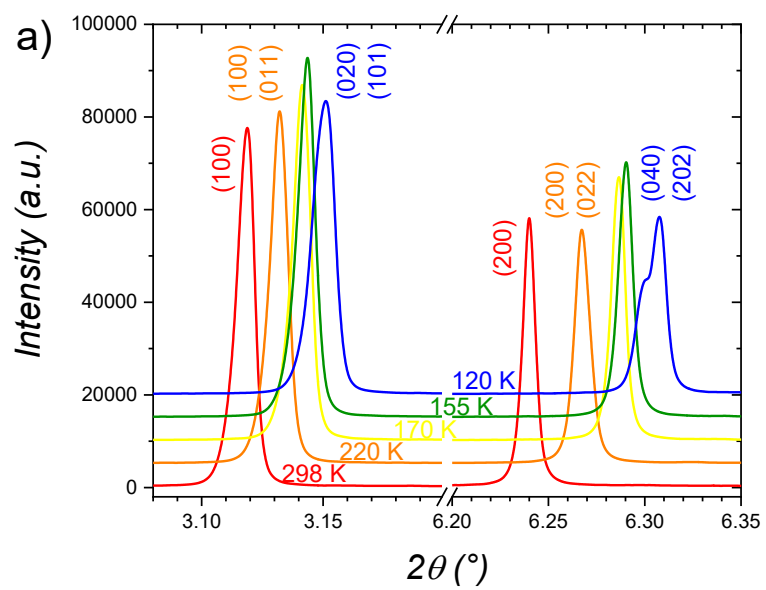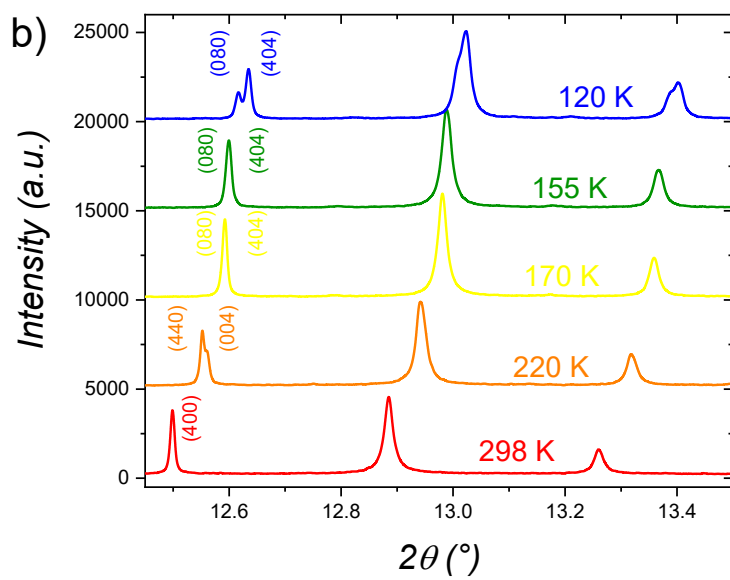

**Figure S7.** Thermal evolution of the diffraction patterns in selected angle ranges.

**Table S9:** Crystallographic data for FAPbBr<sub>3</sub> phase in tetragonal system (*P4/mbm*) from NPD at 200 K,  $a = 8.4303(12)$ ,  $c = 5.9620(14)$  Å and  $V = 423.72(13)$ Å<sup>3</sup>

|            | <i>x</i>   | <i>y</i>   | <i>z</i> | <i>U</i> <sub>iso</sub> | <i>f</i> <sub>occ</sub> |
|------------|------------|------------|----------|-------------------------|-------------------------|
| <b>Pb1</b> | 0          | 0          | 0        | 0.0141(15)              | 1                       |
| <b>Br1</b> | 0          | 0          | 0.5      | 0.047(7)                | 1                       |
| <b>Br2</b> | 0.2726(13) | 0.7726(13) | 0        | 0.052(4)                | 1                       |
| <b>C1</b>  | 0.51253    | -0.0125    | 0.43078  | 0.019(6)                | 0.25                    |
| <b>N1</b>  | 0.40503    | 0.09497    | 0.46733  | 0.048(4)                | 0.25                    |
| <b>N2</b>  | 0.58889    | -0.0889    | 0.58644  | 0.048(4)                | 0.25                    |
| <b>H1</b>  | 0.35143    | 0.14857    | 0.33614  | 0.118(11)               | 0.25                    |
| <b>H2</b>  | 0.37405    | 0.12595    | 0.62500  | 0.118(11)               | 0.25                    |
| <b>H3</b>  | 0.54097    | -0.0410    | 0.25526  | 0.118(11)               | 0.25                    |
| <b>H4</b>  | 0.67077    | -0.1708    | 0.54303  | 0.118(11)               | 0.25                    |
| <b>H5</b>  | 0.56775    | -0.0677    | 0.75049  | 0.118(11)               | 0.25                    |

$R_p = 2.00\%$ ,  $R_{wp} = 2.54\%$ ,  $\chi^2 = 1.31$ ,  $R_{Bragg} = 17.3\%$

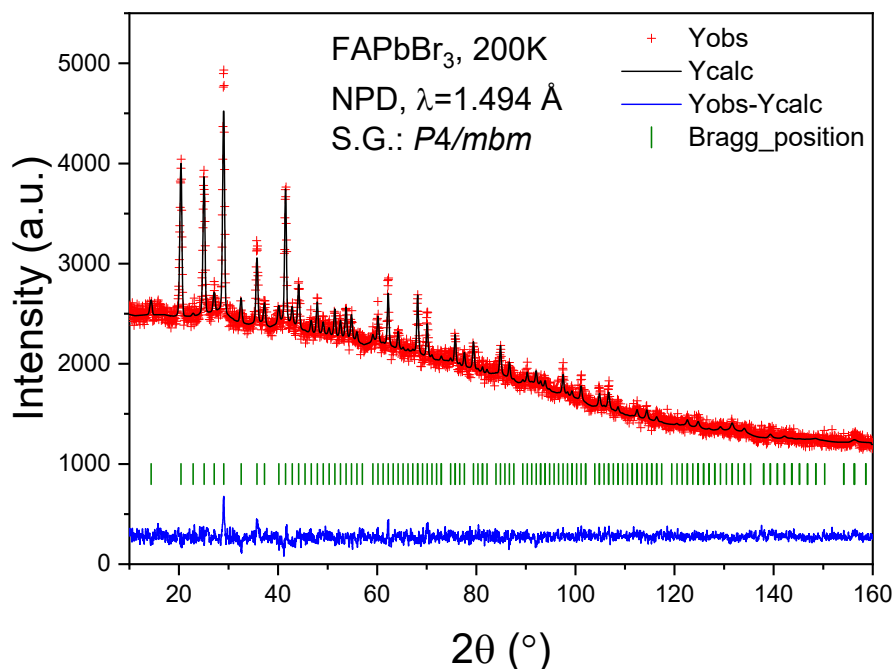

**Figure S8.** Observed (red crosses) calculated (black line) and difference (blue line) neutron diffraction profile after the Rietveld refinement at 200K.

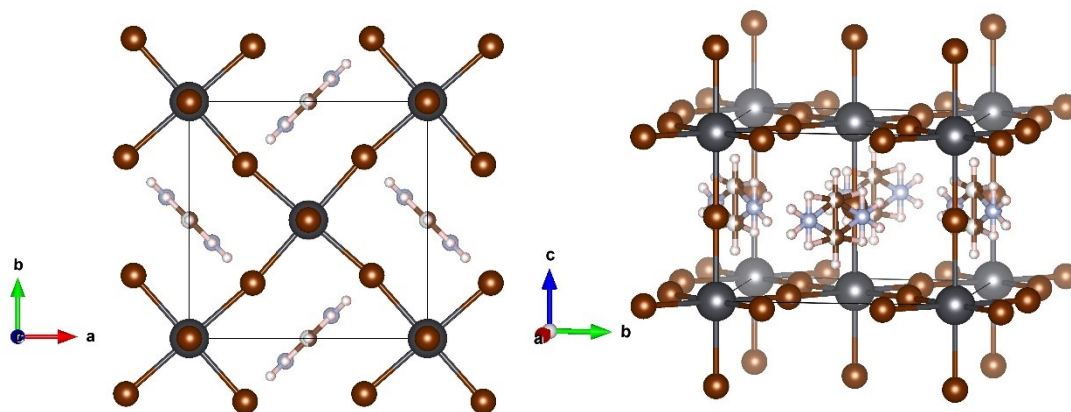

**Figure S9:** Different views of the refined crystallographic models of FAPbBr<sub>3</sub> at 220 K from SCND data.

**Table S10:** Crystallographic results obtained from single crystal ND measurements at 220 K.

| System: Cubic, Space group: $P4/m\bar{3}m$ , $Z = 2$ . Unit-cell parameters:<br>$a = 8.4287(13)$ , $c = 5.9584(15)$ Å and $V = 423.30(14)$ Å <sup>3</sup> |                 |                 |                 |                 |                 |                 |
|-----------------------------------------------------------------------------------------------------------------------------------------------------------|-----------------|-----------------|-----------------|-----------------|-----------------|-----------------|
| Atom                                                                                                                                                      |                 | x               | Y               | z               | U <sub>eq</sub> | Occ             |
| Pb                                                                                                                                                        | 2a              | 0               | 0               | 1               | 0.020(3)        | 1               |
| Br1                                                                                                                                                       | 8i              | 0.2659(12)      | 0.2341(12)      | 1               | 0.074(5)        | 1               |
| Br2                                                                                                                                                       | 2b              | 0               | 0               | 0.5             | 0.084(7)        | 1               |
| C1                                                                                                                                                        | 4f              | 0.5             | 0               | 0.3908(4)       | 0.17(3)         | 0.25            |
| N                                                                                                                                                         | 4h              | 0.5959(16)      | 0.0959(16)      | 0.5             | 0.163(8)        | 0.25            |
| H1                                                                                                                                                        | 4f              | 0.5             | 0               | 0.229654        | 0.1999          | 0.25            |
| H2                                                                                                                                                        | 8k              | 0.658862        | 0.158862        | 0.42625         | 0.1961          | 0.25            |
| H3                                                                                                                                                        | 8k              | 0.596299        | 0.096299        | 0.64601         | 0.1961          | 0.25            |
| Anisotropic displacement parameters (Å <sup>2</sup> )                                                                                                     |                 |                 |                 |                 |                 |                 |
|                                                                                                                                                           | U <sup>11</sup> | U <sup>22</sup> | U <sup>33</sup> | U <sup>12</sup> | U <sup>13</sup> | U <sup>23</sup> |
| Pb                                                                                                                                                        | 0.026(3)        | 0.026(3)        | 0.009(7)        | 0               | 0               | 0               |
| Br1                                                                                                                                                       | 0.060(5)        | 0.060(5)        | 0.100(13)       | -0.041(5)       | 0               | 0               |
| Br2                                                                                                                                                       | 0.122(13)       | 0.122(13)       | 0.007(14)       | 0               | 0               | 0               |
| C                                                                                                                                                         | 0.047(11)       | 0.047(11)       | 0.40(10)        | -0.025(12)      | 0               | 0               |
| N                                                                                                                                                         | 0.123(10)       | 0.123(10)       | 0.24(2)         | -0.028(12)      | 0               | 0               |
| H1                                                                                                                                                        | 0.056955        | 0.056955        | 0.485858        | -0.030325       | 0               | 0               |
| H2                                                                                                                                                        | 0.14789         | 0.14789         | 0.292493        | -0.033463       | 0               | 0               |
| H3                                                                                                                                                        | 0.14789         | 0.14789         | 0.292493        | -0.033463       | 0               | 0               |
| RF <sup>2</sup> = 19.3%; RF <sup>2</sup> <sub>w</sub> = 28.5%; $\chi^2 = 4.42$                                                                            |                 |                 |                 |                 |                 |                 |

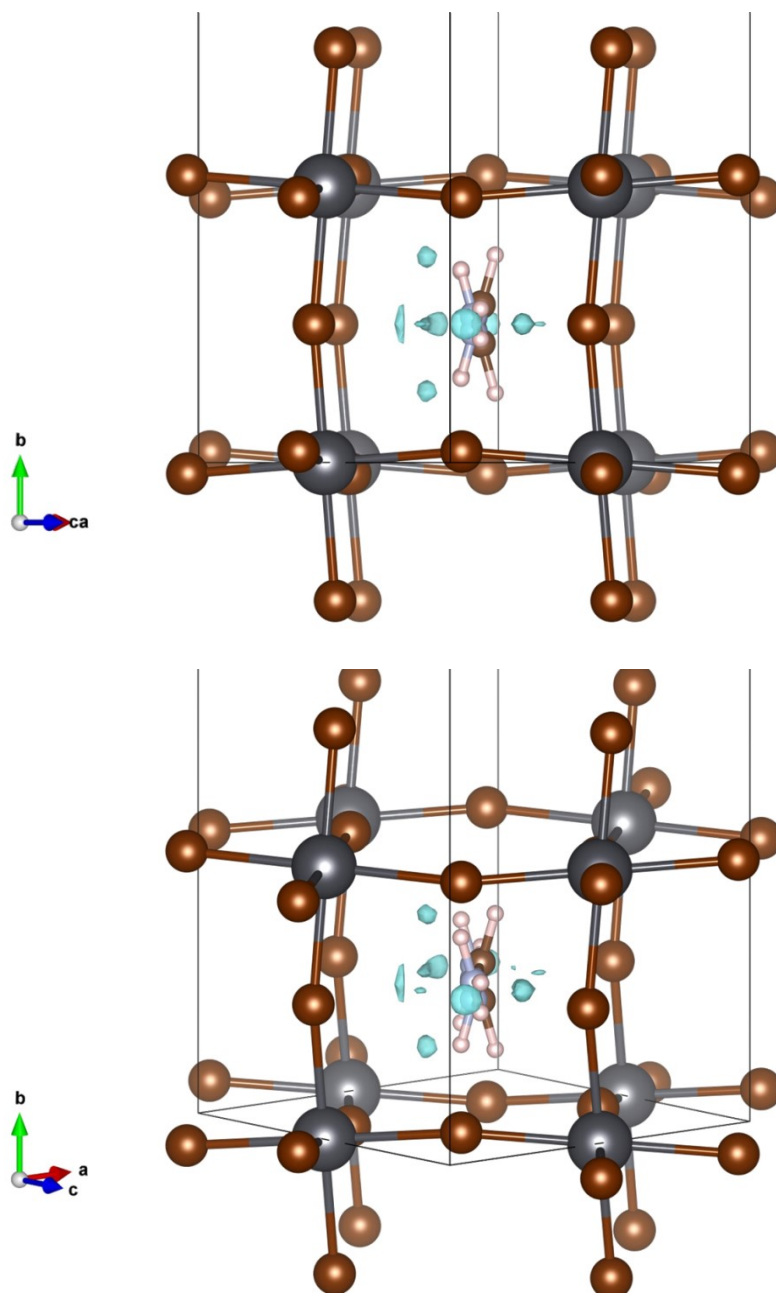

**Figure S10.** Views of the orthorhombic crystal structure of FAPbBr<sub>3</sub>, showing negative areas (blue) in the Difference Fourier Maps, suggesting an additional FA molecule.

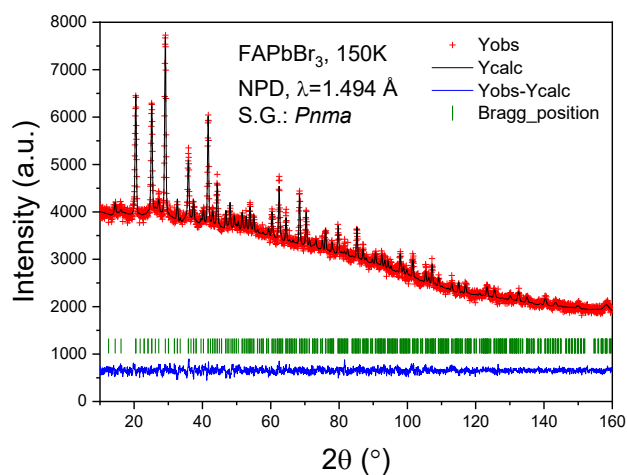

**Figure S11.** Observed (red crosses) calculated (black line) and difference (blue line) neutron diffraction profile after the Rietveld refinement at 150 K.

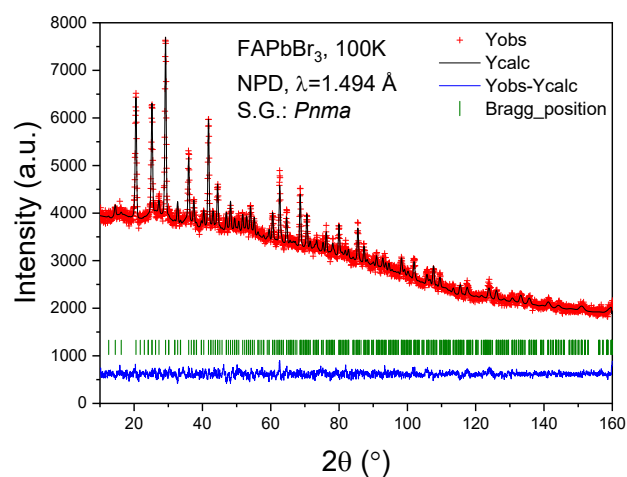

**Figure S12.** Observed (red crosses) calculated (black line) and difference (blue line) neutron diffraction profile after the Rietveld refinement at 100 K.

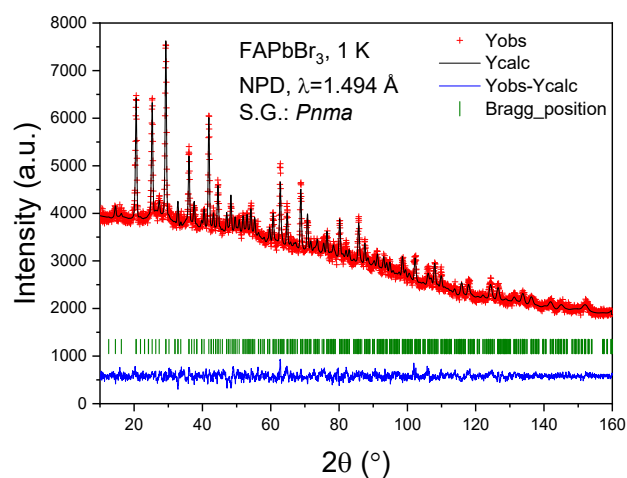

**Figure S13.** Observed (red crosses) calculated (black line) and difference (blue line) neutron diffraction profile after the Rietveld refinement at 1 K.

**Table S11:** Crystallographic data for FAPbBr<sub>3</sub> phase in orthorhombic system (*Pnma*) from NPD at 150 K,  $a = 8.400(2)$  Å,  $b = 11.8784(16)$  Å,  $c = 8.4068(20)$  Å and  $V = 838.8(3)$ Å<sup>3</sup>

|                                                                             | <i>x</i>  | <i>y</i> | <i>z</i> | $U_{iso}$  | $f_{occ}$ |
|-----------------------------------------------------------------------------|-----------|----------|----------|------------|-----------|
| <b>Pb1</b>                                                                  | 0         | 0        | 0.5      | 0.0184(17) | 1         |
| <b>Br1</b>                                                                  | -0.051(3) | 0.25     | 0.511(7) | 0.050(7)   | 1         |
| <b>Br2</b>                                                                  | 0.769(3)  | 0.004(3) | 0.231(3) | 0.040(3)   | 1         |
| <b>C1</b>                                                                   | 0.53881   | 0.28534  | 0.52617  | 0.019(6)   | 0.25      |
| <b>C2</b>                                                                   | 0.48263   | 0.27743  | 0.49481  | 0.019(6)   | 0.25      |
| <b>N1</b>                                                                   | 0.60767   | 0.21885  | 0.42442  | 0.048(4)   | 0.25      |
| <b>N2</b>                                                                   | 0.40403   | 0.26459  | 0.59632  | 0.048(4)   | 0.25      |
| <b>N3</b>                                                                   | 0.41839   | 0.21107  | 0.59970  | 0.048(4)   | 0.25      |
| <b>N4</b>                                                                   | 0.59321   | 0.24788  | 0.39499  | 0.048(4)   | 0.25      |
| <b>H1</b>                                                                   | 0.59900   | 0.36501  | 0.55504  | 0.052(8)   | 0.25      |
| <b>H2</b>                                                                   | 0.71263   | 0.24163  | 0.37544  | 0.052(8)   | 0.25      |
| <b>H3</b>                                                                   | 0.55795   | 0.14461  | 0.39337  | 0.052(8)   | 0.25      |
| <b>H4</b>                                                                   | 0.35894   | 0.32106  | 0.67401  | 0.052(8)   | 0.25      |
| <b>H5</b>                                                                   | 0.34342   | 0.19280  | 0.57447  | 0.052(8)   | 0.25      |
| <b>H6</b>                                                                   | 0.44033   | 0.36501  | 0.49018  | 0.052(8)   | 0.25      |
| <b>H7</b>                                                                   | 0.63658   | 0.30500  | 0.31726  | 0.052(8)   | 0.25      |
| <b>H8</b>                                                                   | 0.63666   | 0.16860  | 0.39376  | 0.052(8)   | 0.25      |
| <b>H9</b>                                                                   | 0.33293   | 0.24107  | 0.67282  | 0.052(8)   | 0.25      |
| <b>H10</b>                                                                  | 0.45248   | 0.12983  | 0.60942  | 0.052(8)   | 0.25      |
| $R_p = 1.65\%$ , $R_{wp} = 2.07\%$ , $\chi^2 = 1.39$ , $R_{Bragg} = 10.9\%$ |           |          |          |            |           |



**Table S12:** Crystallographic data for FAPbBr<sub>3</sub> phase in orthorhombic system (*Pnma*) from NPD at 100K,  $a = 8.384(2)$  Å,  $b = 11.8471(17)$  Å,  $c = 8.382(2)$  Å and  $V = 832.5(3)$  Å<sup>3</sup>

|                                                                             | <i>x</i>  | <i>y</i>    | <i>z</i> | $U_{iso}$  | $f_{occ}$ |
|-----------------------------------------------------------------------------|-----------|-------------|----------|------------|-----------|
| <b>Pb1</b>                                                                  | 0         | 0           | 0.5      | 0.0171(18) | 1         |
| <b>Br1</b>                                                                  | -0.043(2) | 0.25        | 0.506(6) | 0.031(4)   | 1         |
| <b>Br2</b>                                                                  | 0.769(3)  | -0.0146(15) | 0.230(4) | 0.048(4)   | 1         |
| <b>C1</b>                                                                   | 0.52733   | 0.28947     | 0.52793  | 0.014(5)   | 0.25      |
| <b>C2</b>                                                                   | 0.49015   | 0.27981     | 0.48886  | 0.014(5)   | 0.25      |
| <b>N1</b>                                                                   | 0.58794   | 0.22691     | 0.41585  | 0.043(5)   | 0.25      |
| <b>N2</b>                                                                   | 0.40071   | 0.26425     | 0.61006  | 0.043(5)   | 0.25      |
| <b>N3</b>                                                                   | 0.41699   | 0.21769     | 0.59370  | 0.043(5)   | 0.25      |
| <b>N4</b>                                                                   | 0.59898   | 0.24356     | 0.39098  | 0.043(5)   | 0.25      |
| <b>H1</b>                                                                   | 0.58762   | 0.36964     | 0.55528  | 0.057(8)   | 0.25      |
| <b>H2</b>                                                                   | 0.68691   | 0.25303     | 0.35790  | 0.057(8)   | 0.25      |
| <b>H3</b>                                                                   | 0.53770   | 0.15244     | 0.38559  | 0.057(8)   | 0.25      |
| <b>H4</b>                                                                   | 0.36172   | 0.31788     | 0.69522  | 0.057(8)   | 0.25      |
| <b>H5</b>                                                                   | 0.34045   | 0.19178     | 0.59019  | 0.057(8)   | 0.25      |
| <b>H6</b>                                                                   | 0.45757   | 0.36964     | 0.48251  | 0.057(8)   | 0.25      |
| <b>H7</b>                                                                   | 0.64982   | 0.29778     | 0.31312  | 0.057(8)   | 0.25      |
| <b>H8</b>                                                                   | 0.63370   | 0.16193     | 0.39137  | 0.057(8)   | 0.25      |
| <b>H9</b>                                                                   | 0.33374   | 0.25284     | 0.66524  | 0.057(8)   | 0.25      |
| <b>H10</b>                                                                  | 0.44198   | 0.13467     | 0.60495  | 0.057(8)   | 0.25      |
| $R_p = 1.70\%$ , $R_{wp} = 2.14\%$ , $\chi^2 = 1.45$ , $R_{Bragg} = 13.2\%$ |           |             |          |            |           |

**Table S13:** Crystallographic data for FAPbBr<sub>3</sub> phase in orthorhombic system (*Pnma*) from NPD at 1 K,  $a = 8.3633(16)$  Å,  $b = 11.8204(16)$  Å,  $c = 8.3663(17)$  Å and  $V = 827.1(3)$  Å<sup>3</sup>

|                                                                             | <i>x</i>  | <i>y</i>    | <i>z</i> | $U_{iso}$  | $f_{occ}$ |
|-----------------------------------------------------------------------------|-----------|-------------|----------|------------|-----------|
| <b>Pb1</b>                                                                  | 0         | 0           | 0.5      | 0.0108(18) | 1         |
| <b>Br1</b>                                                                  | -0.052(2) | 0.25        | 0.499(5) | 0.020(3)   | 1         |
| <b>Br2</b>                                                                  | 0.769(3)  | -0.0108(16) | 0.232(3) | 0.035(3)   | 1         |
| <b>C1</b>                                                                   | 0.52370   | 0.28490     | 0.52505  | 0.002(4)   | 0.25      |
| <b>C2</b>                                                                   | 0.49201   | 0.28239     | 0.49079  | 0.002(4)   | 0.25      |
| <b>N1</b>                                                                   | 0.59364   | 0.22601     | 0.41399  | 0.026(4)   | 0.25      |
| <b>N2</b>                                                                   | 0.40832   | 0.24822     | 0.61534  | 0.026(4)   | 0.25      |
| <b>N3</b>                                                                   | 0.59942   | 0.24935     | 0.38862  | 0.026(4)   | 0.25      |
| <b>N4</b>                                                                   | 0.42238   | 0.21709     | 0.59466  | 0.026(4)   | 0.25      |
| <b>H1</b>                                                                   | 0.56521   | 0.37218     | 0.54401  | 0.044(7)   | 0.25      |
| <b>H2</b>                                                                   | 0.68257   | 0.26124     | 0.34923  | 0.044(7)   | 0.25      |
| <b>H3</b>                                                                   | 0.56057   | 0.14543     | 0.39122  | 0.044(7)   | 0.25      |
| <b>H4</b>                                                                   | 0.36067   | 0.29981     | 0.69896  | 0.044(7)   | 0.25      |
| <b>H5</b>                                                                   | 0.36532   | 0.16882     | 0.60335  | 0.044(7)   | 0.25      |
| <b>H6</b>                                                                   | 0.45751   | 0.37218     | 0.48922  | 0.044(7)   | 0.25      |
| <b>H7</b>                                                                   | 0.64749   | 0.30589     | 0.31193  | 0.044(7)   | 0.25      |
| <b>H8</b>                                                                   | 0.63578   | 0.16792     | 0.38454  | 0.044(7)   | 0.25      |
| <b>H9</b>                                                                   | 0.33999   | 0.24987     | 0.66980  | 0.044(7)   | 0.25      |
| <b>H10</b>                                                                  | 0.44926   | 0.13394     | 0.60161  | 0.044(7)   | 0.25      |
| $R_p = 1.83\%$ , $R_{wp} = 2.35\%$ , $\chi^2 = 1.77$ , $R_{Bragg} = 16.1\%$ |           |             |          |            |           |

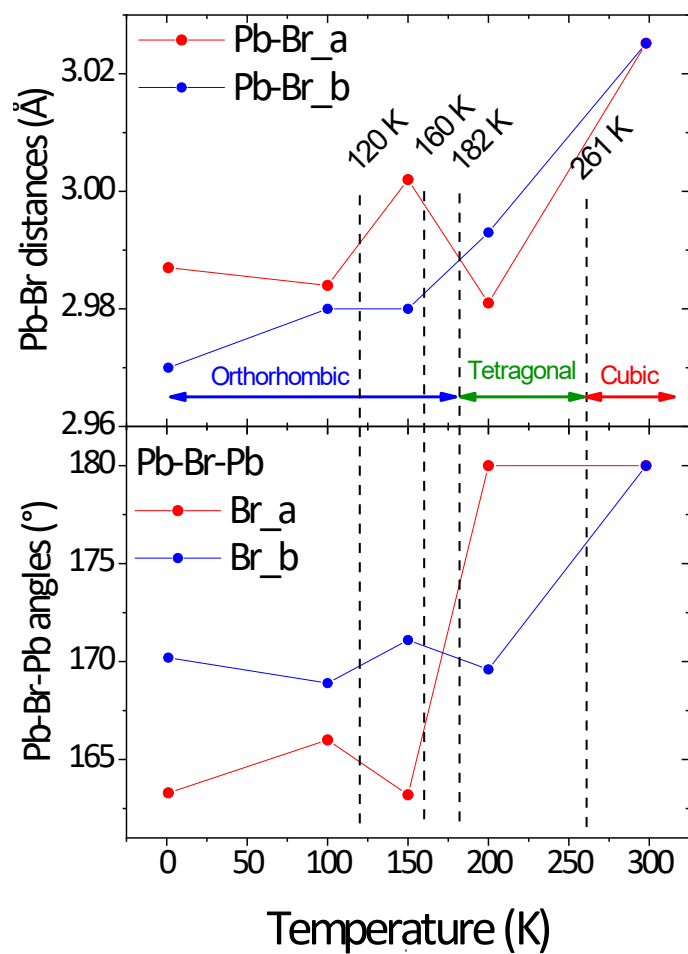

**Figure S14.** Thermal evolution of Pb–Br distances and Br–Pb–Br angles. Dashed lines indicate the events observed in DSC.

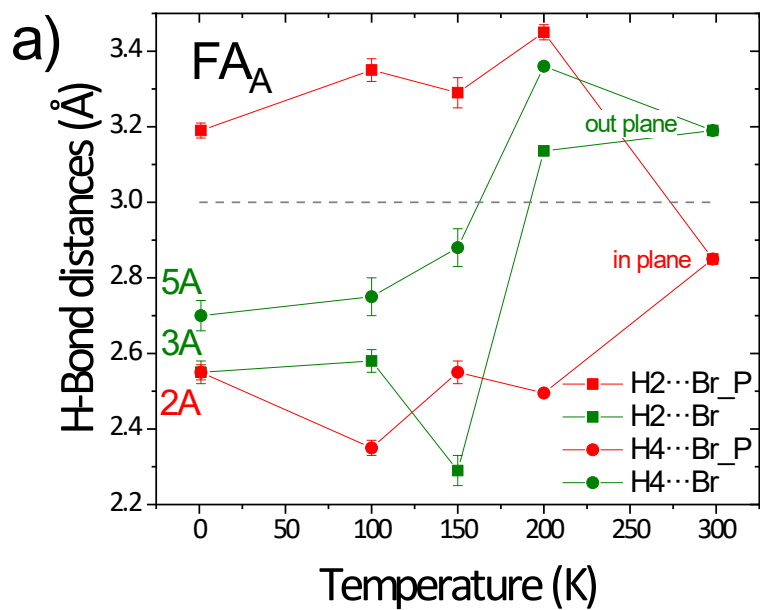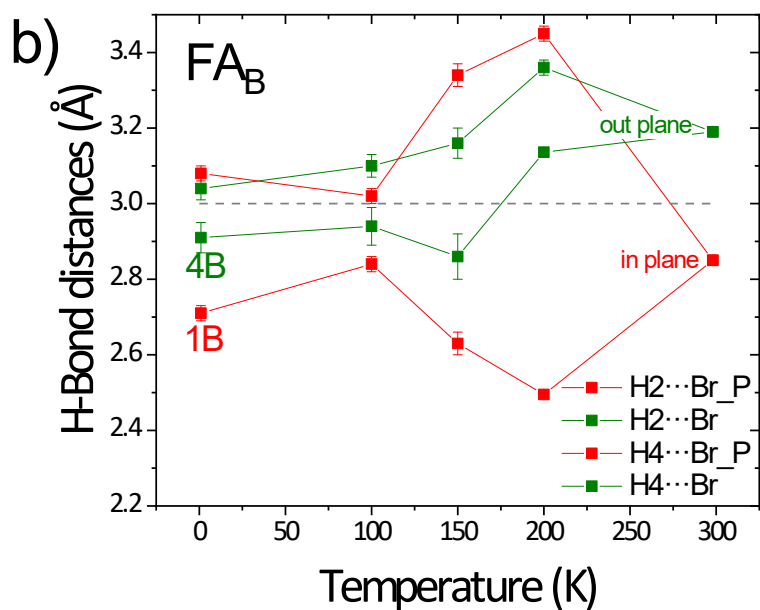

**Figure S15:** Thermal evolution of the H-bond distances of the atom H2 and H4 from 1 K to 300K, obtained from NPD data.

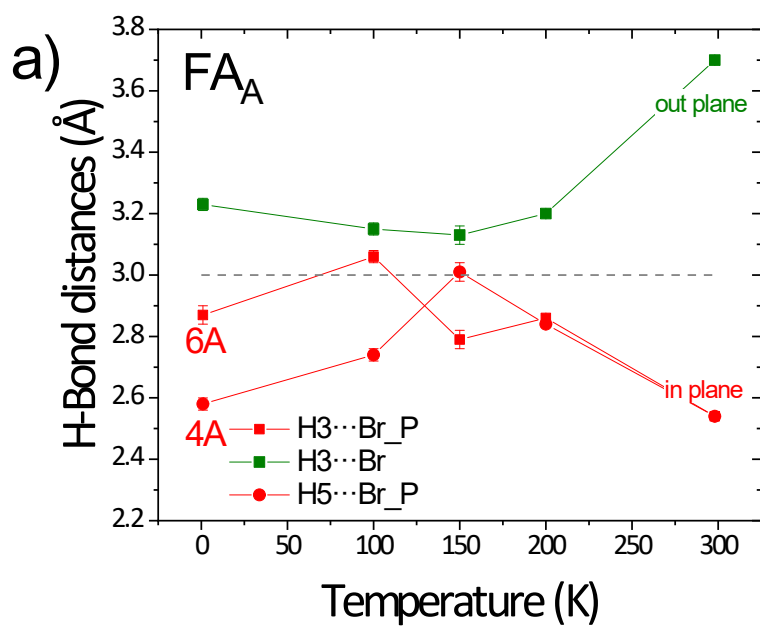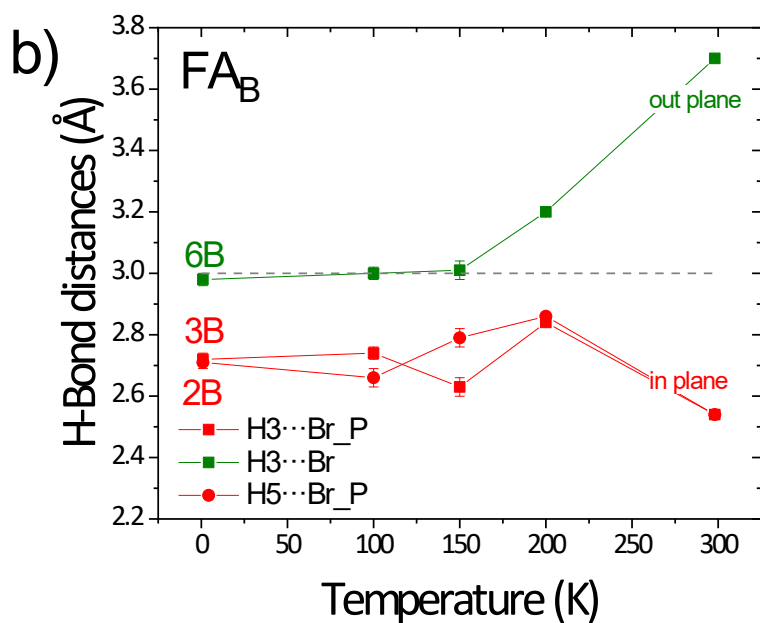

**Figure S16:** Thermal evolution of the H-bond distances of the atom H3 and H5 from 1 K to 300K, obtained from NPD data.
